# Supplementary material for: Predictive Characteristics of Diabetes-Associated Autoantibodies Among Children With HLA-Conferred Disease Susceptibility in the General Population
Source: Oxford University Press journal article supplement (doi:10.2337/db08-1305), 2009-09-15
Supplement: db08-1305-online_appendix.pdf [file db08-1305-online_appendix.pdf]

**Supplementary Fig. 1.** The DIPP Study cohort.

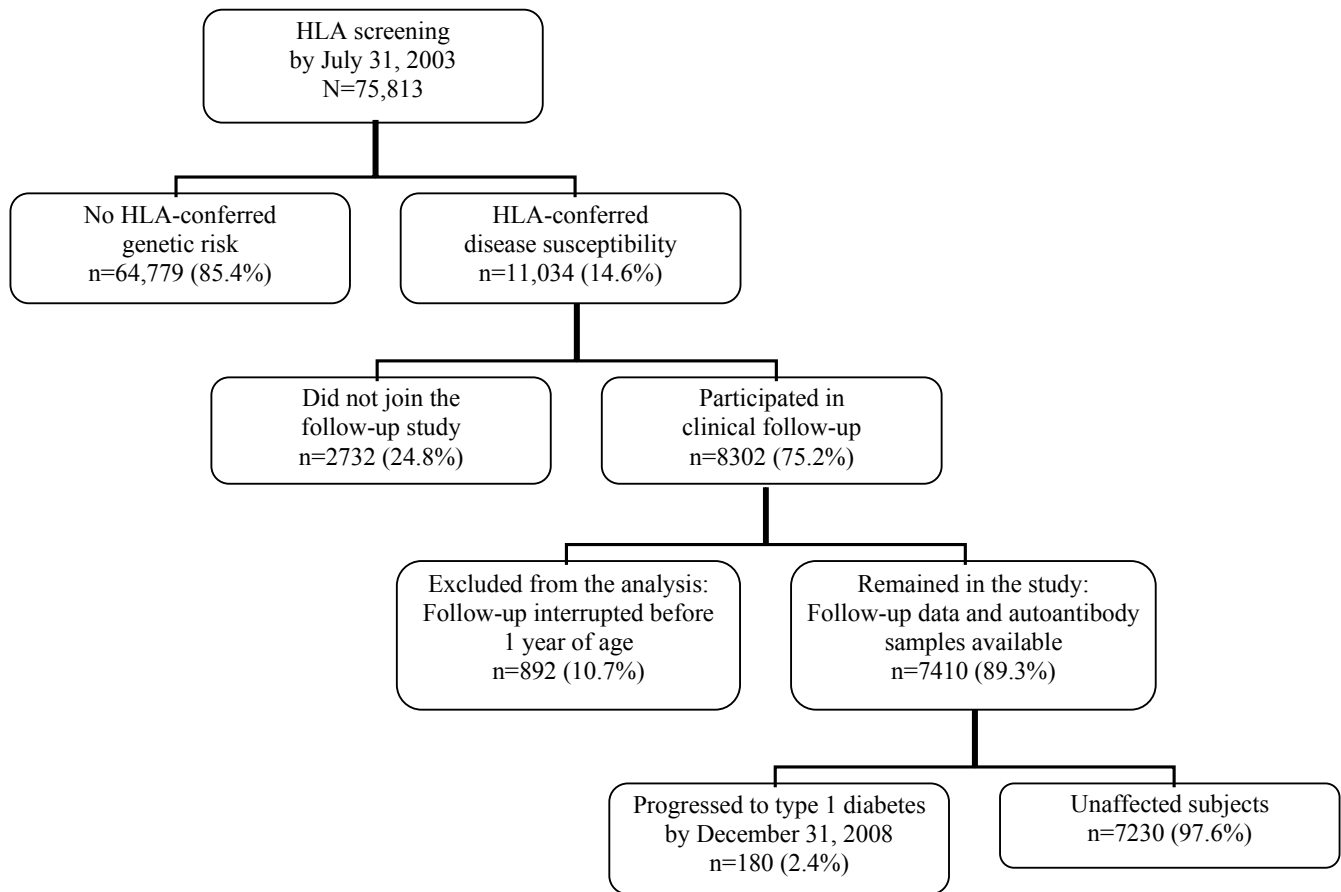

Supplementary Table 1: Comparison between those children who carried the high risk HLA genotype and those with moderate risk genotypes. T1D, Type 1 diabetes; ICA, islet cell antibodies; DAA, diabetes-associated autoantibodies. \* $P < 0.001$ , † $P = 0.004$ , ‡ $P = 0.03$ , § $P = 0.04$ .

|                                                      | High risk      | Moderate risk   |
|------------------------------------------------------|----------------|-----------------|
|                                                      | n (%)          |                 |
| Total                                                | 1575 (21.3)    | 5835 (78.7)     |
| Males                                                | 829 (52.6)     | 3068 (52.6)     |
| Progression to T1D                                   | 80 (5.1)       | 100 (1.7)*      |
| T1D affected family members at index child's birth   | 53 (3.4)       | 124 (2.1)†      |
| Participation in the intervention study              | 82 (5.2)       | 137 (2.3)*      |
| ICA-based seroconversion                             | 325 (20.6)     | 848 (14.5)*     |
| Positivity for $\geq 2$ DAAs <sup>a</sup>            | 141 (43.4)     | 250 (29.5)*     |
| Persistent autoantibody positivity <sup>a</sup>      | 194 (59.7)     | 487 (56.4)*     |
| Persistently positive for $\geq 2$ DAAs <sup>a</sup> | 109 (33.5)     | 174 (20.5)*     |
|                                                      | Years          |                 |
| Age at diagnosis                                     | 5.1 (1.0–12.0) | 4.9 (0.9–12.5)  |
| Age at seroconversion                                | 3.5 (0.3–13.3) | 4.0 (0.2–13.7)‡ |
| Age at maximal DAA status                            | 4.2 (0.5–13.3) | 5.0 (0.5–13.7)§ |
| Delay from seroconversion to diagnosis               | 2.8 (0.1–9.0)  | 2.8 (0.0–10.9)  |

<sup>a</sup>% of ICA-positive subjects. Details regarding the DAA combinations; see Supplementary Table 3.

Supplementary Table 2. 5-year predictive characteristics of the four diabetes-associated autoantibodies (DAA): Islet cell antibodies (ICA), insulin antibodies (IAA), glutamic acid antibodies (GADA), and islet antigen-2 antibodies (IA-2A). T1D+/ All+, progressors/all subjects positive for the given specificity; CI<sub>95%</sub>, 95% confidence interval; prefix “p”, persistently positive autoantibody; PPV and NPV, positive and negative predictive value. In the case of defined autoantibody categories, each individual is included in only one category.

| Combinations of autoantibodies         | T1D+/All+, n | Sensitivity, % (CI <sub>95%</sub> ) | Specificity, % (CI <sub>95%</sub> ) | PPV, % (CI <sub>95%</sub> ) | NPV, % (CI <sub>95%</sub> ) | Cumulative risk, % (CI <sub>95%</sub> ) |
|----------------------------------------|--------------|-------------------------------------|-------------------------------------|-----------------------------|-----------------------------|-----------------------------------------|
| Total number of subjects               | 147/6747     |                                     |                                     |                             |                             |                                         |
| ICA the only positive DAA              | 3/222        | 2.0 (0.4–5.8)                       | 96.7 (96.2–97.1)                    | 1.4 (0.3–3.9)               | 97.8 (97.4–98.1)            | 1.4 (0–2.9)                             |
| Double positivity                      | 12/33        | 8.2 (4.3–13.8)                      | 99.7 (99.5–99.8)                    | 36.4 (20.4–54.9)            | 98.0 (97.6–98.3)            | 36.4 (20.0–52.8)                        |
| ICA, IAA                               | 9/17         | 6.1 (2.8–11.3)                      | 99.9 (99.8–99.9)                    | 52.9 (27.8–77.0)            | 97.9 (97.6–98.3)            | 52.9 (29.2–76.7)                        |
| ICA, GADA                              | 0/10         | 0 (0–2.5)                           | 99.8 (99.7–99.9)                    | 0 (0–30.8)                  | 97.8 (97.4–98.2)            | 0 (0–0)                                 |
| ICA, IA-2A                             | 3/6          | 2.0 (0.4–5.8)                       | 100 (99.9–100)                      | 50.0 (11.8–88.2)            | 97.9 (97.5–98.2)            | 50.0 (10.0–90.0)                        |
| Triple positivity                      | 32/52        | 21.8 (15.4–29.3)                    | 99.7 (99.5–99.8)                    | 61.5 (47.0–74.7)            | 98.3 (97.9–98.6)            | 61.5 (48.3–74.8)                        |
| ICA, IAA, GADA                         | 12/22        | 8.2 (4.3–13.8)                      | 99.8 (99.7–99.9)                    | 54.5 (32.2–75.6)            | 98.0 (97.6–98.3)            | 54.5 (33.7–75.4)                        |
| ICA, IAA, IA-2A                        | 13/20        | 8.8 (4.8–14.6)                      | 99.9 (99.8–100)                     | 65.0 (40.8–84.6)            | 98.0 (97.6–98.3)            | 65.0 (44.1–85.9)                        |
| ICA, GADA, IA-2A                       | 7/10         | 4.8 (1.9–9.6)                       | 100 (99.9–100)                      | 70.0 (34.8–93.3)            | 97.9 (97.6–98.2)            | 70.0 (41.6–98.4)                        |
| All four DAA positive                  | 71/120       | 48.3 (40.0–56.7)                    | 99.3 (99.0–99.5)                    | 59.2 (49.8–68.0)            | 98.9 (98.6–99.1)            | 59.2 (50.4–68.0)                        |
| Positive for at least ICA              | 118/427      | 80.3 (72.9–86.4)                    | 95.3 (94.8–95.8)                    | 27.6 (23.4–32.1)            | 99.5 (99.3–99.7)            | 27.6 (23.4–31.9)                        |
| ≥ 2 positive DAA                       | 115/205      | 78.2 (70.7–84.6)                    | 98.6 (98.3–98.9)                    | 56.1 (49.0–63.0)            | 99.5 (99.3–99.7)            | 56.1 (49.3–62.9)                        |
| ≥ 3 positive DAA                       | 103/172      | 70.1 (62.0–77.3)                    | 99.0 (98.7–99.2)                    | 59.9 (52.1–67.3)            | 99.3 (99.1–99.5)            | 59.9 (52.6–67.2)                        |
| Only ICA persistently positive         | 6/127        | 4.1 (1.5–8.7)                       | 98.2 (97.8–98.5)                    | 4.7 (1.8–10.0)              | 97.9 (97.5–98.2)            | 4.7 (1.0–8.4)                           |
| Persistent double positivity           | 26/42        | 17.7 (11.9–24.8)                    | 99.8 (99.6–99.9)                    | 61.9 (45.6–76.4)            | 98.2 (97.8–98.5)            | 61.9 (47.2–76.6)                        |
| pICA, pIAA                             | 9/11         | 6.1 (2.8–11.3)                      | 100 (99.9–100)                      | 81.8 (48.2–97.7)            | 98.0 (97.6–98.3)            | 81.8 (59.0–100)                         |
| pICA, pGADA                            | 2/7          | 1.4 (0.2–4.8)                       | 99.9 (99.8–100)                     | 28.6 (3.7–71.0)             | 97.8 (97.5–98.2)            | 28.6 (0–62.0)                           |
| pICA, pIA-2A                           | 15/24        | 10.2 (5.8–16.3)                     | 99.9 (99.7–99.9)                    | 62.5 (40.6–81.2)            | 98.0 (97.7–98.4)            | 62.5 (43.1–81.9)                        |
| Persistent triple positivity           | 37/63        | 25.2 (18.4–33)                      | 99.6 (99.4–99.7)                    | 58.7 (45.6–71.0)            | 98.4 (98.0–98.6)            | 58.7 (46.6–70.9)                        |
| pICA, pIAA, pGADA                      | 9/15         | 6.1 (2.8–11.3)                      | 99.9 (99.8–100)                     | 60.0 (32.3–83.7)            | 98.0 (97.6–98.3)            | 60.0 (35.2–84.8)                        |
| pICA, pIAA, pIA-2A                     | 16/24        | 10.9 (6.4–17.1)                     | 99.9 (99.8–99.9)                    | 66.7 (44.7–84.4)            | 98.1 (97.7–98.4)            | 66.7 (47.8–85.5)                        |
| pICA, pGADA, pIA-2A                    | 12/24        | 8.2 (4.3–13.8)                      | 99.8 (99.7–99.9)                    | 50.0 (29.1–70.9)            | 98.0 (97.6–98.3)            | 50.0 (30.0–70.0)                        |
| All four DAA persistently positive     | 41/68        | 27.9 (20.8–35.9)                    | 99.6 (99.4–99.7)                    | 60.3 (47.7–72.0)            | 98.4 (98.1–98.7)            | 60.3 (48.7–71.9)                        |
| Persistently positive for at least ICA | 110/300      | 74.8 (67.0–81.6)                    | 97.1 (96.7–97.5)                    | 36.7 (31.2–42.4)            | 99.4 (99.2–99.6)            | 36.7 (31.2–42.1)                        |
| ≥ 2 DAA persistently positive          | 104/173      | 70.7 (62.7–78.0)                    | 99.0 (98.7–99.2)                    | 60.1 (52.4–67.5)            | 99.3 (99.1–99.5)            | 60.1 (52.8–67.4)                        |
| ≥ 3 DAA persistently positive          | 78/131       | 53.1 (44.7–61.3)                    | 99.2 (99.0–99.4)                    | 59.5 (50.6–68.0)            | 99.0 (98.7–99.2)            | 59.5 (51.1–67.9)                        |

Supplementary Table 3. Predictive characteristics of the four diabetes-associated autoantibodies (DAA) among children with the high-risk HLA genotype (A) and the moderate-risk genotypes (B). Antibodies against islet cells (ICA), insulin (IAA), glutamic acid (GADA), and islet antigen-2 (IA-2A). T1D+/ All+, progressors/all subjects positive for the given specificity; CI<sub>95%</sub>, 95% confidence interval; prefix “p”, persistently positive autoantibody; PPV and NPV, positive and negative predictive value. In the case of defined autoantibody categories, each individual is included in only one category.

A

| Combinations of autoantibodies         | T1D+/All+, n | Sensitivity, % (CI <sub>95%</sub> ) | Specificity, % (CI <sub>95%</sub> ) | PPV, % (CI <sub>95%</sub> ) | NPV, % (CI <sub>95%</sub> ) | Cumulative risk, % (CI <sub>95%</sub> ) |
|----------------------------------------|--------------|-------------------------------------|-------------------------------------|-----------------------------|-----------------------------|-----------------------------------------|
| Total number of subjects               | 80/1575      |                                     |                                     |                             |                             |                                         |
| ICA the only positive DAA              | 0/184        | 0 (0–4.5)                           | 87.7 (85.9–89.3)                    | 0 (0–2.0)                   | 94.2 (92.9–95.4)            | 0 (0–0)                                 |
| Double positivity                      | 8/42         | 10.0 (4.4–18.8)                     | 97.7 (96.8–98.4)                    | 19.0 (8.6–34.1)             | 95.3 (94.1–96.3)            | 25.4 (9.4–41.4)                         |
| ICA, IAA                               | 6/18         | 7.5 (2.8–15.6)                      | 99.2 (98.6–99.6)                    | 33.3 (13.3–59.0)            | 95.2 (94.1–96.2)            | 39.4 (13.2–65.6)                        |
| ICA, GADA                              | 1/21         | 1.3 (0–6.8)                         | 98.7 (97.9–99.2)                    | 4.8 (0.1–23.8)              | 94.9 (93.7–96.0)            | 8.3 (0–24.0)                            |
| ICA, IA-2A                             | 1/3          | 1.3 (0–6.8)                         | 99.9 (99.5–100)                     | 33.3 (0.8–90.6)             | 95.0 (93.8–96.0)            | 50.0 (0–100)                            |
| Triple positivity                      | 22/39        | 27.5 (18.1–38.6)                    | 98.9 (98.2–99.3)                    | 56.4 (39.6–72.2)            | 96.2 (95.1–97.1)            | 74.0 (55.4–92.6)                        |
| ICA, IAA, GADA                         | 12/20        | 15.0 (8.0–24.7)                     | 99.5 (98.9–99.8)                    | 60.0 (36.1–80.9)            | 95.6 (94.5–96.6)            | 72.0 (48.5–95.5)                        |
| ICA, IAA, IA-2A                        | 8/8          | 10.0 (4.4–18.8)                     | 100 (99.8–100)                      | 100 (63.1–100)              | 95.4 (94.2–96.4)            | 100 (100–100)                           |
| ICA, GADA, IA-2A                       | 2/11         | 2.5 (0.3–8.7)                       | 99.4 (98.9–99.7)                    | 18.2 (2.3–51.8)             | 95.0 (93.8–96.0)            | 25.0 (0–55.0)                           |
| All four DAA positive                  | 40/60        | 50.0 (38.6–61.4)                    | 98.7 (97.9–99.2)                    | 66.7 (53.3–78.3)            | 97.4 (96.4–98.1)            | 85.5 (72.0–99.0)                        |
| Positive for at least ICA              | 70/325       | 87.5 (78.2–93.8)                    | 84.6 (82.7–86.5)                    | 23.7 (19.0–29.0)            | 99.2 (98.5–99.6)            | 35.4 (27.0–43.8)                        |
| ≥ 2 positive DAA                       | 70/141       | 87.5 (78.2–93.8)                    | 95.3 (94.0–96.3)                    | 49.6 (41.1–58.2)            | 99.3 (98.7–99.7)            | 74.7 (62.4–87.1)                        |
| ≥ 3 positive DAA                       | 62/99        | 77.5 (66.8–86.1)                    | 97.5 (96.6–98.3)                    | 62.6 (52.3–72.1)            | 98.8 (98.1–99.3)            | 81.3 (70.1–92.5)                        |
| Only ICA persistently positive         | 2/85         | 2.5 (0.3–8.7)                       | 94.4 (93.2–95.6)                    | 2.4 (0.3–8.2)               | 94.8 (93.5–95.8)            | 3.4 (0–8.0)                             |
| Persistent double positivity           | 14/26        | 17.5 (9.9–27.6)                     | 99.2 (98.6–99.6)                    | 53.8 (33.4–73.4)            | 95.7 (94.6–96.7)            | 100 (100–100)                           |
| pICA, pIAA                             | 6/7          | 7.5 (2.8–15.6)                      | 99.9 (99.6–100)                     | 85.7 (42.1–99.6)            | 95.3 (94.1–96.3)            | 100 (100–100)                           |
| pICA, pGADA                            | 2/11         | 2.5 (0.3–8.7)                       | 99.4 (98.9–99.7)                    | 18.2 (2.3–51.8)             | 95.0 (93.8–96.0)            | 23.8 (0–52.8)                           |
| pICA, pIA-2A                           | 6/8          | 7.5 (2.8–15.6)                      | 99.9 (99.5–100)                     | 75.0 (34.9–96.8)            | 95.3 (94.1–96.3)            | 100 (100–100)                           |
| Persistent triple positivity           | 27/52        | 33.8 (23.6–45.2)                    | 98.3 (97.5–98.9)                    | 51.9 (37.6–66.0)            | 96.5 (95.5–97.4)            | 65.5 (47.3–83.7)                        |
| pICA, pIAA, pGADA                      | 9/13         | 11.3 (5.3–20.3)                     | 99.7 (99.3–99.9)                    | 69.2 (38.6–90.9)            | 95.5 (94.3–96.4)            | 20.0 (0–55.1)                           |
| pICA, pIAA, pIA-2A                     | 9/9          | 11.3 (5.3–20.3)                     | 100 (99.8–100)                      | 100 (66.4–100)              | 95.5 (94.3–96.4)            | 63.3 (39.6–87.1)                        |
| pICA, pGADA, pIA-2A                    | 9/30         | 11.3 (5.3–20.3)                     | 98.6 (97.9–99.1)                    | 30.0 (14.7–49.4)            | 95.4 (94.2–96.4)            | 63.5 (35.1–91.9)                        |
| All four DAA persistently positive     | 25/31        | 31.3 (21.3–42.6)                    | 99.6 (99.1–99.9)                    | 80.6 (62.5–92.5)            | 96.4 (95.4–97.3)            | 94.7 (84.7–100)                         |
| Persistently positive for at least ICA | 68/194       | 85.0 (75.3–92.0)                    | 91.6 (90.0–92.9)                    | 35.1 (28.4–42.2)            | 99.1 (98.5–99.6)            | 53.8 (42.7–64.8)                        |
| ≥ 2 DAA persistently positive          | 66/109       | 82.5 (72.4–90.1)                    | 97.1 (96.1–97.9)                    | 60.6 (50.7–69.8)            | 99.0 (98.4–99.5)            | 82.4 (71.1–93.8)                        |
| ≥ 3 DAA persistently positive          | 52/83        | 65.0 (53.5–75.3)                    | 97.9 (97.1–98.6)                    | 62.7 (51.3–73.0)            | 98.1 (97.3–98.7)            | 80.5 (68.0–93.0)                        |

## B

| Combinations of autoantibodies         | T1D+/All+, n | Sensitivity, % (CI <sub>95%</sub> ) | Specificity, % (CI <sub>95%</sub> ) | PPV, % (CI <sub>95%</sub> ) | NPV, % (CI <sub>95%</sub> ) | Cumulative risk, % (CI <sub>95%</sub> ) |
|----------------------------------------|--------------|-------------------------------------|-------------------------------------|-----------------------------|-----------------------------|-----------------------------------------|
| Total number of subjects               | 100/5835     |                                     |                                     |                             |                             |                                         |
| ICA the only positive DAA              | 1/598        | 1.0 (0–5.4)                         | 89.6 (88.8–90.4)                    | 0.2 (0–0.9)                 | 98.1 (97.7–98.5)            | 0.4 (0–1.1)                             |
| Double positivity                      | 6/86         | 6.0 (2.2–12.6)                      | 98.6 (98.3–98.9)                    | 7.0 (2.6–14.6)              | 98.4 (98.0–98.7)            | 11.3 (1.6–21.1)                         |
| ICA, IAA                               | 4/38         | 4.0 (1.1–9.9)                       | 99.4 (99.2–99.6)                    | 10.5 (2.9–24.8)             | 98.3 (98.0–98.7)            | 17.8 (0–36.0)                           |
| ICA, GADA                              | 1/39         | 1.0 (0–5.4)                         | 99.3 (99.1–99.5)                    | 2.6 (0.1–13.5)              | 98.3 (97.9–98.6)            | 2.6 (0–7.5)                             |
| ICA, IA-2A                             | 1/9          | 1.0 (0–5.4)                         | 99.9 (99.7–99.9)                    | 11.1 (0.3–48.2)             | 98.3 (97.9–98.6)            | 16.7 (0–46.5)                           |
| Triple positivity                      | 20/48        | 20.0 (12.7–29.2)                    | 99.5 (99.3–99.7)                    | 41.7 (27.6–56.8)            | 98.6 (98.3–98.9)            | 57.2 (39.1–75.4)                        |
| ICA, IAA, GADA                         | 3/16         | 3.0 (0.6–8.5)                       | 99.8 (99.6–99.9)                    | 18.8 (4.0–45.6)             | 98.3 (98.0–98.6)            | 24.2 (0–48.7)                           |
| ICA, IAA, IA-2A                        | 12/19        | 12.0 (6.4–20.0)                     | 99.9 (99.7–100)                     | 63.2 (38.4–83.7)            | 98.5 (98.1–98.8)            | 75.4 (52.5–98.4)                        |
| ICA, GADA, IA-2A                       | 5/13         | 5.0 (1.6–11.3)                      | 99.9 (99.7–99.9)                    | 38.5 (13.9–68.4)            | 98.4 (98.0–98.7)            | 53.8 (21.1–86.6)                        |
| All four DAA positive                  | 58/116       | 58.0 (47.7–67.8)                    | 99.0 (98.7–99.2)                    | 50.0 (40.6–59.4)            | 99.3 (99.0–99.5)            | 72.5 (57.9–87.1)                        |
| Positive for at least ICA              | 85/848       | 85.0 (76.5–91.4)                    | 86.7 (85.8–87.6)                    | 10.0 (8.1–12.2)             | 99.7 (99.5–99.8)            | 19.8 (14.4–25.1)                        |
| ≥ 2 positive DAA                       | 84/250       | 84.0 (75.3–90.6)                    | 97.1 (96.6–97.5)                    | 33.6 (27.8–39.8)            | 99.7 (99.5–99.8)            | 56.5 (44.3–68.6)                        |
| ≥ 3 positive DAA                       | 78/164       | 78.0 (68.6–85.7)                    | 98.5 (98.2–98.8)                    | 47.6 (39.7–55.5)            | 99.6 (99.4–99.8)            | 69.0 (56.6–81.4)                        |
| Only ICA persistently positive         | 4/304        | 4.0 (1.1–9.9)                       | 94.8 (94.2–95.3)                    | 1.3 (0.4–3.3)               | 98.3 (97.9–98.6)            | 2.8 (0–5.5)                             |
| Persistent double positivity           | 23/56        | 23.0 (15.2–32.5)                    | 99.4 (99.2–99.6)                    | 41.1 (28.1–55.0)            | 98.7 (98.3–98.9)            | 68.8 (48.3–89.3)                        |
| pICA, pIAA                             | 5/5          | 5.0 (1.6–11.3)                      | 100 (99.9–100)                      | 100 (47.8–100)              | 98.4 (98.0–98.7)            | 100 (100–100)                           |
| pICA, pGADA                            | 0/15         | 0 (0–3.6)                           | 99.7 (99.6–99.9)                    | 0 (0–21.8)                  | 98.3 (97.9–98.6)            | 0 (0–0)                                 |
| pICA, pIA-2A                           | 18/36        | 18.0 (11.0–26.9)                    | 99.7 (99.5–99.8)                    | 50.0 (32.9–67.1)            | 98.6 (98.2–98.9)            | 70.6 (49.7–91.4)                        |
| Persistent triple positivity           | 26/69        | 26.0 (17.7–35.7)                    | 99.3 (99.0–99.5)                    | 37.7 (26.3–50.2)            | 98.7 (98.4–99.0)            | 67.8 (43.1–92.5)                        |
| pICA, pIAA, pGADA                      | 1/5          | 1.0 (0–5.4)                         | 99.9 (99.8–100)                     | 20.0 (0.5–71.6)             | 98.3 (97.9–98.6)            | 20.0 (0–55.1)                           |
| pICA, pIAA, pIA-2A                     | 11/19        | 11.0 (5.6–18.8)                     | 99.9 (99.7–99.9)                    | 57.9 (33.5–79.7)            | 98.5 (98.1–98.8)            | 63.3 (39.6–87.1)                        |
| pICA, pGADA, pIA-2A                    | 14/45        | 14.0 (7.9–22.4)                     | 99.5 (99.2–99.6)                    | 31.1 (18.2–46.6)            | 98.5 (98.2–98.8)            | 63.5 (35.1–91.9)                        |
| All four DAA persistently positive     | 30/49        | 30.0 (21.2–40.0)                    | 99.7 (99.5–99.8)                    | 61.2 (46.2–74.8)            | 98.8 (98.5–99.1)            | 71.2 (55.0–87.4)                        |
| Persistently positive for at least ICA | 83/478       | 83.0 (74.2–89.8)                    | 93.1 (92.4–93.8)                    | 17.4 (14.1–21.1)            | 99.7 (99.5–99.8)            | 34.6 (25.8–43.5)                        |
| ≥ 2 DAA persistently positive          | 79/174       | 79.0 (69.7–86.5)                    | 98.3 (98.0–98.7)                    | 45.4 (37.9–53.1)            | 99.6 (99.4–99.8)            | 67.5 (55.4–79.7)                        |
| ≥ 3 DAA persistently positive          | 56/118       | 56.0 (45.7–65.9)                    | 98.9 (98.6–99.2)                    | 47.5 (38.2–56.9)            | 99.2 (99.0–99.4)            | 80.5 (68.0–93.0)                        |
